# Supplementary material
Source: PubMed Central journal article supplement (PMC5984525)

# Block 1

## Haploid

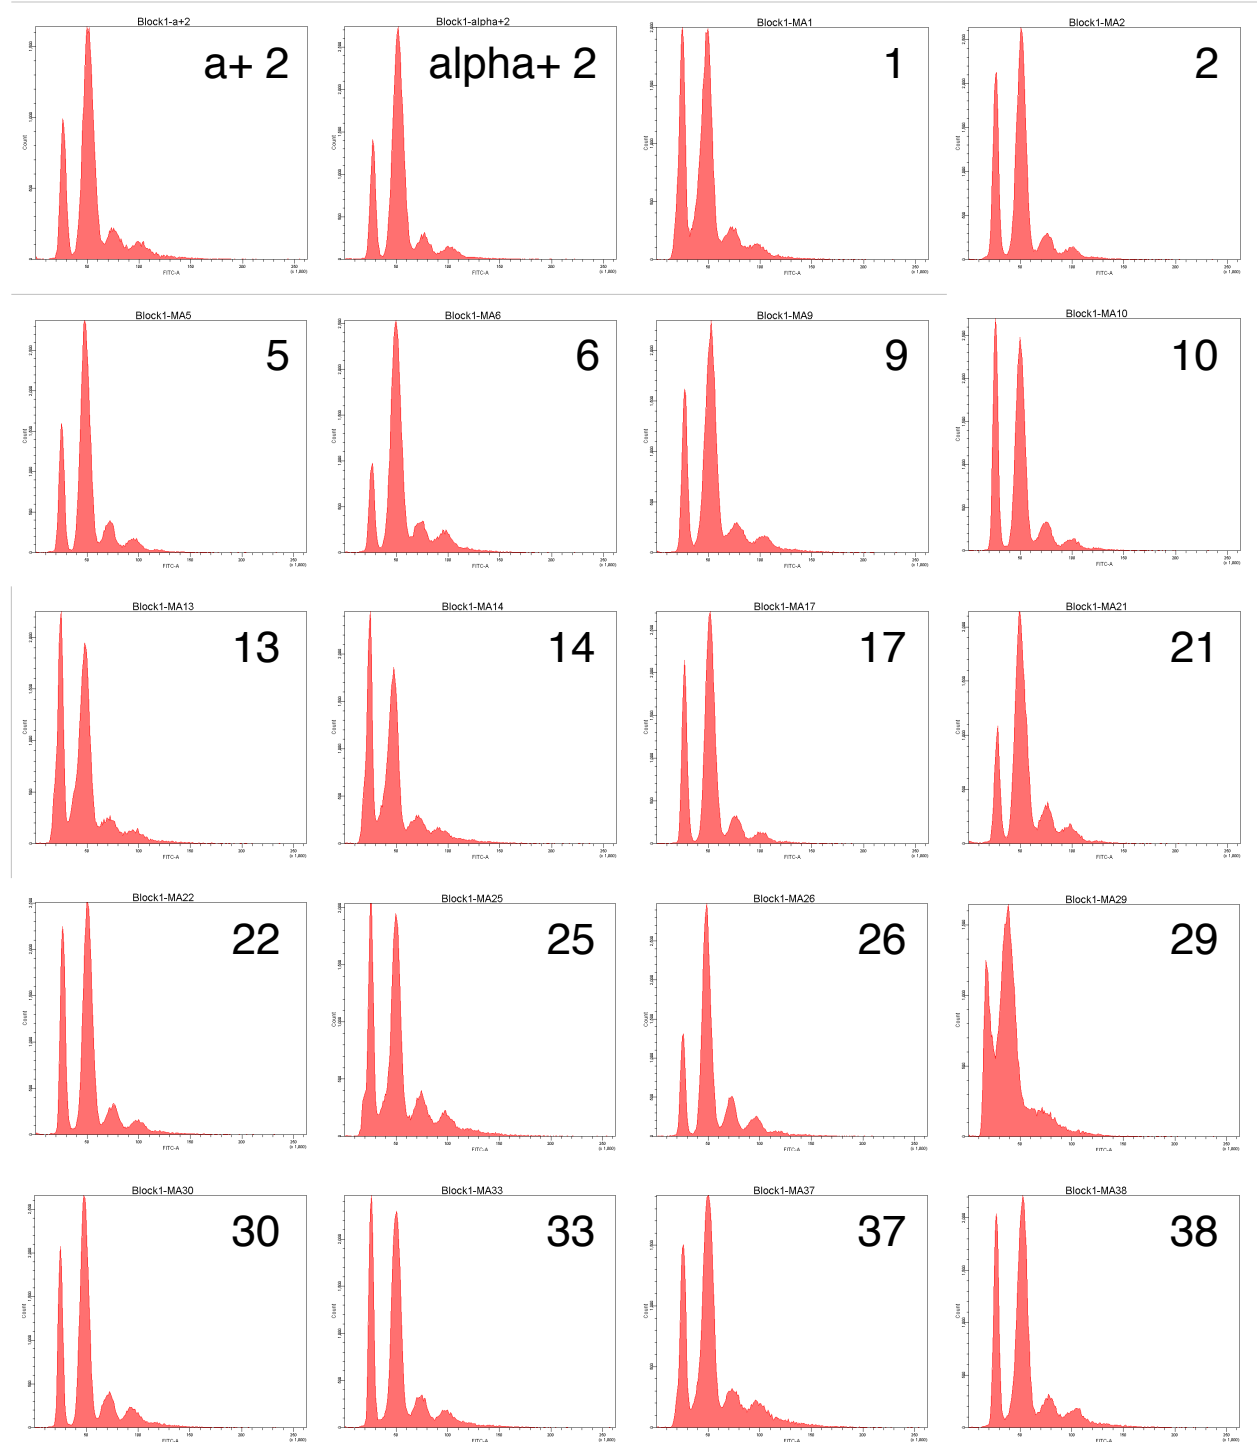

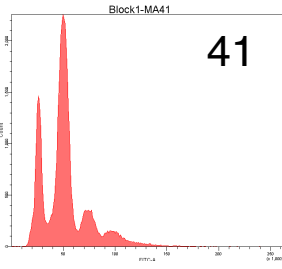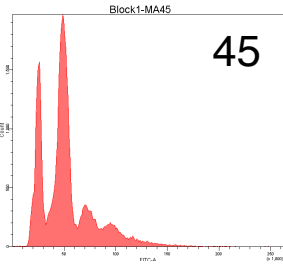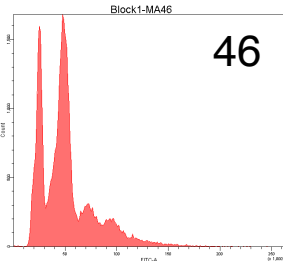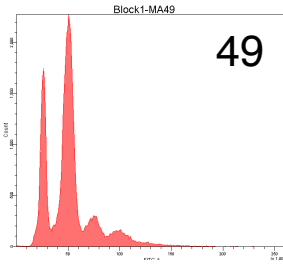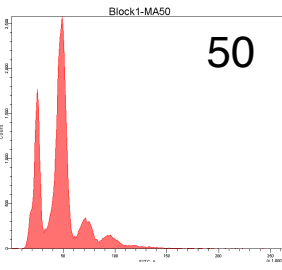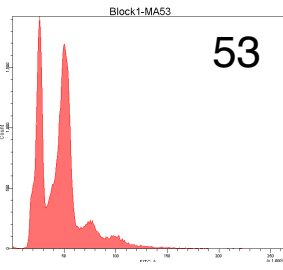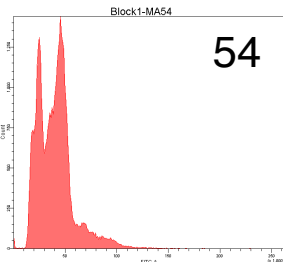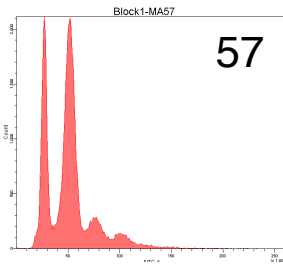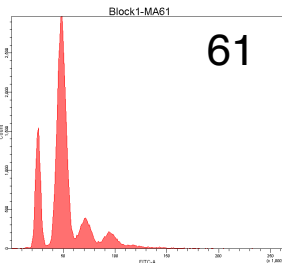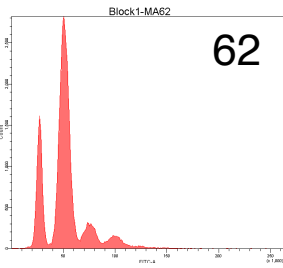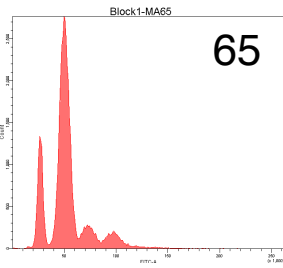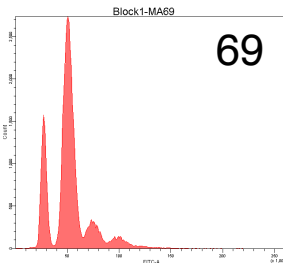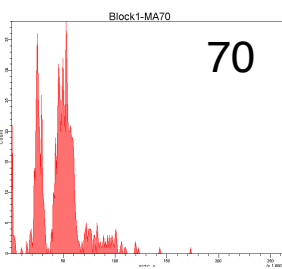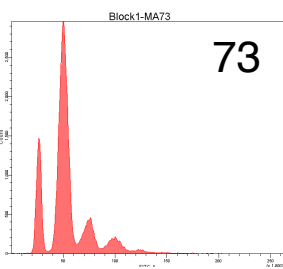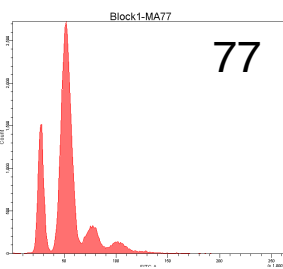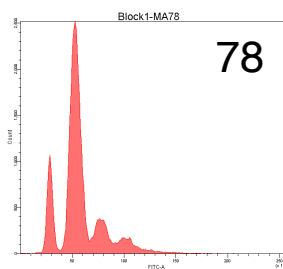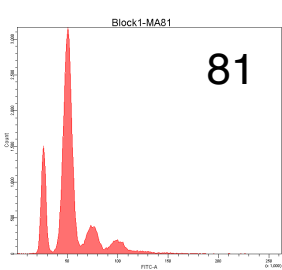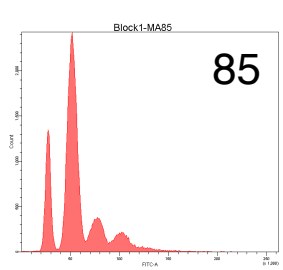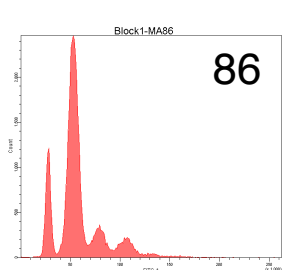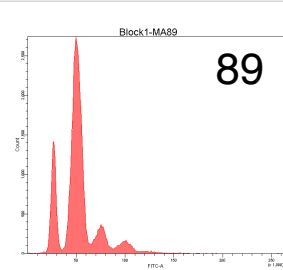

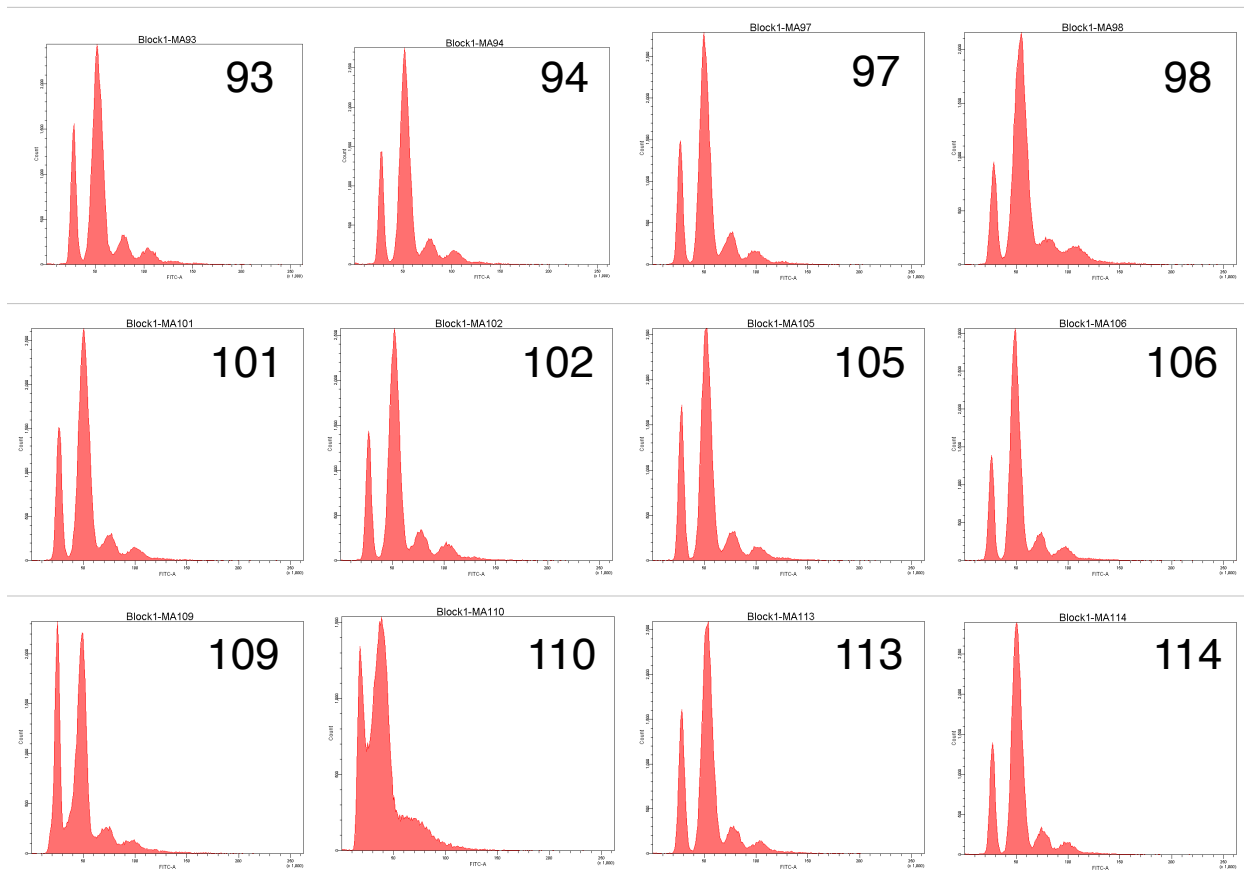

### Diploid

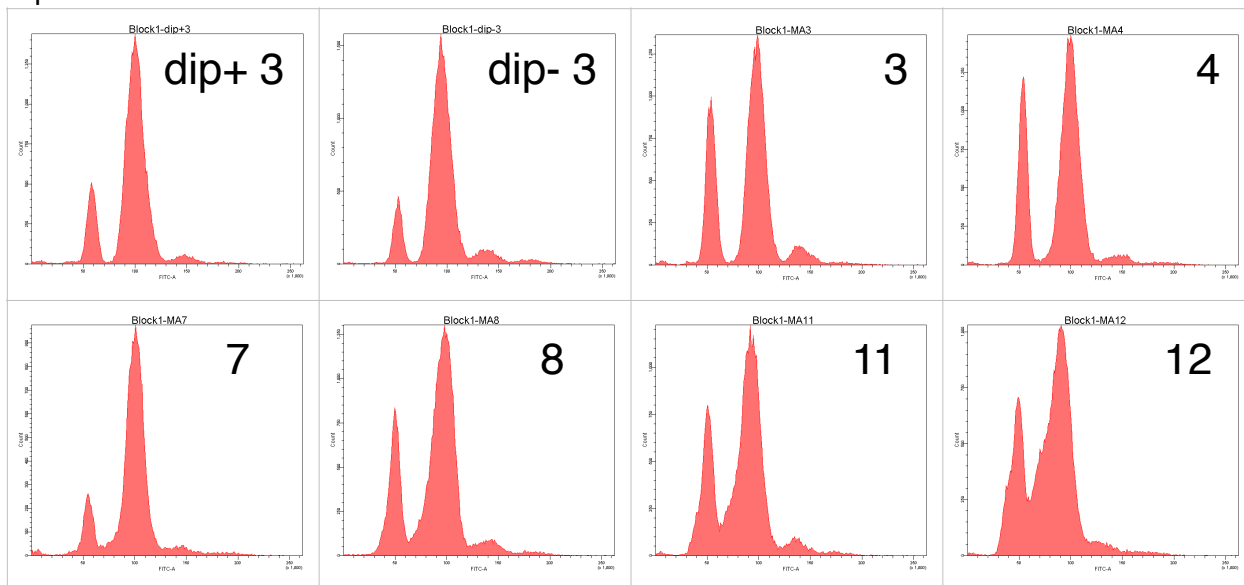

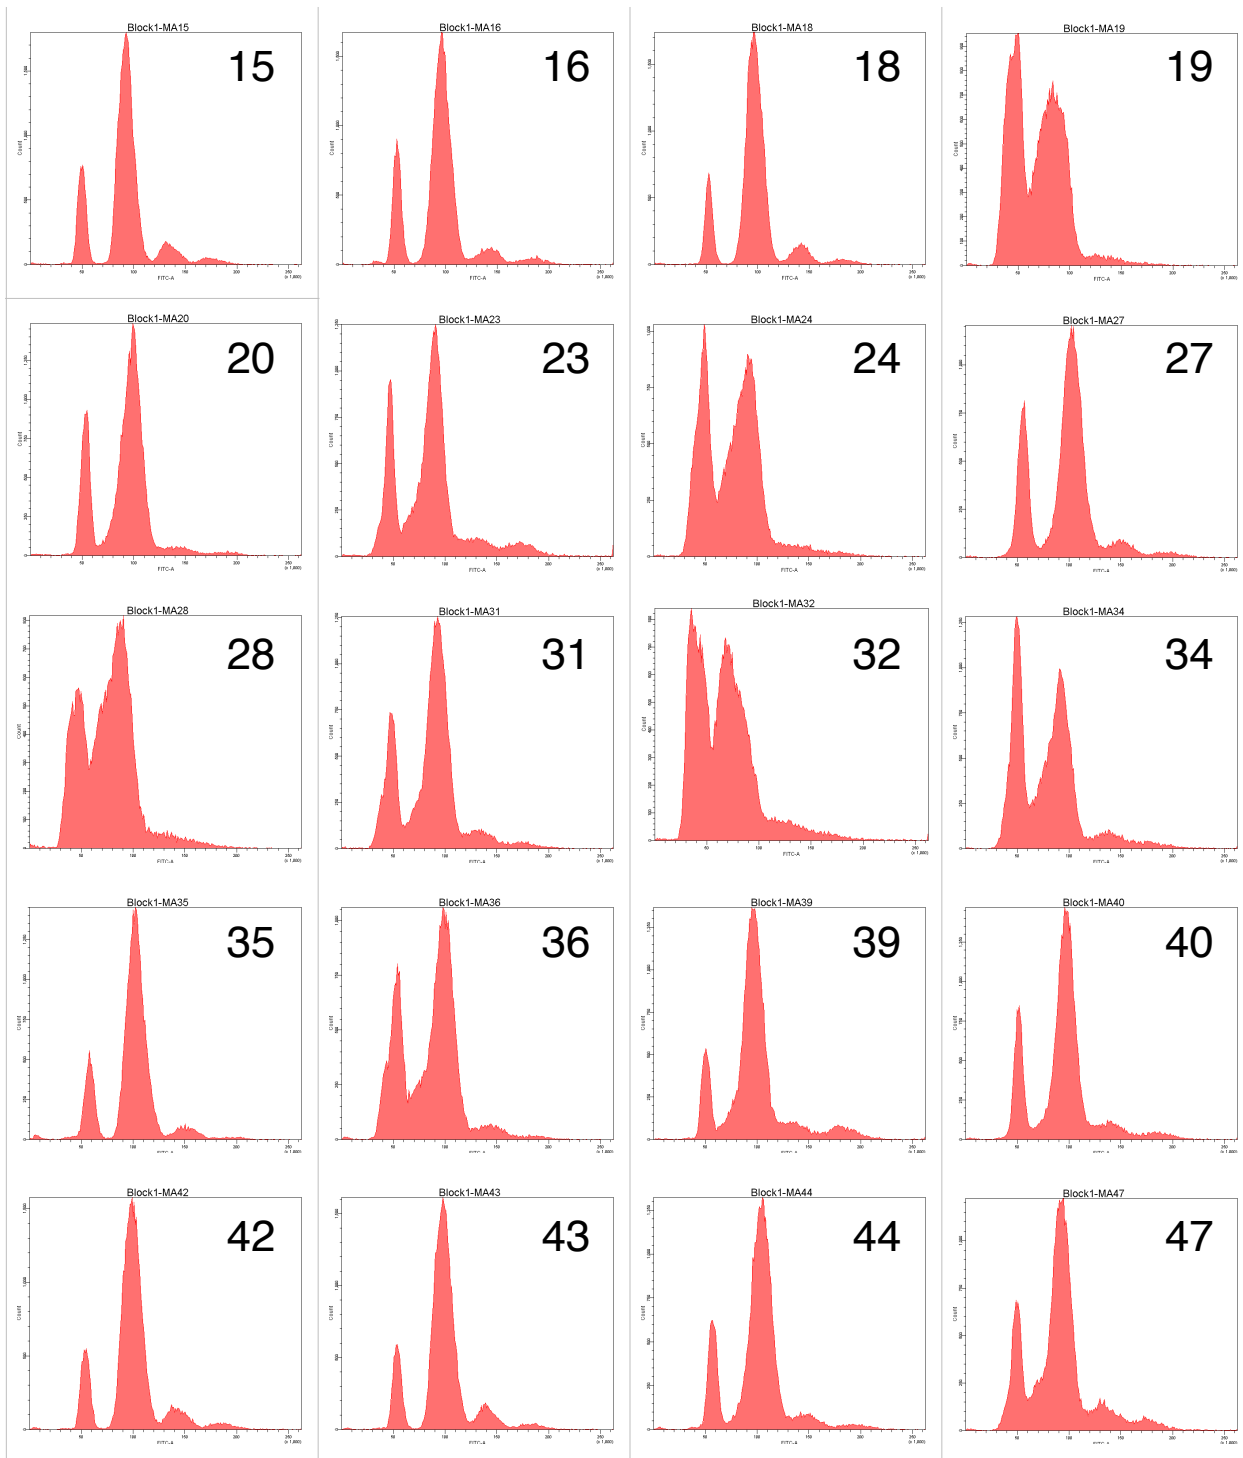



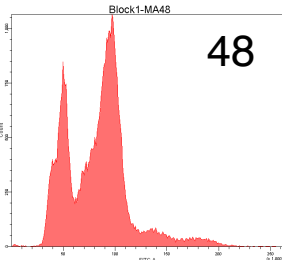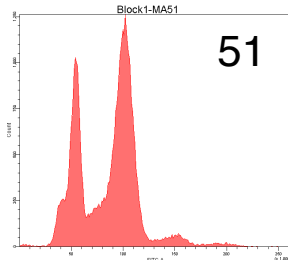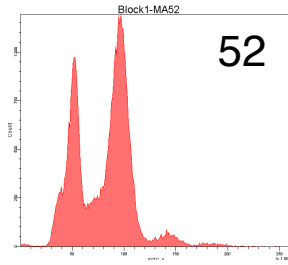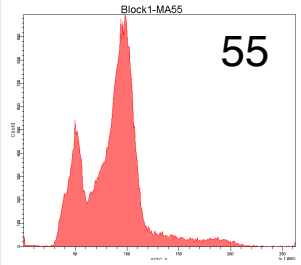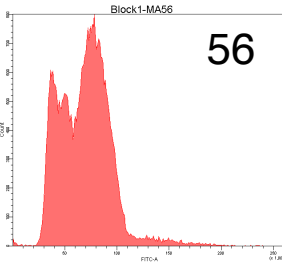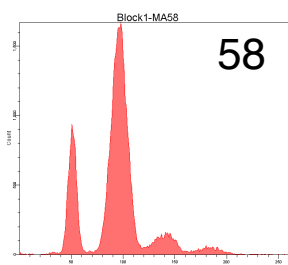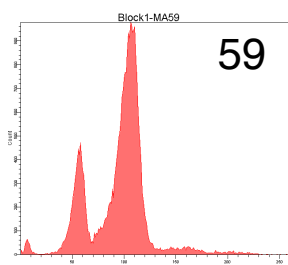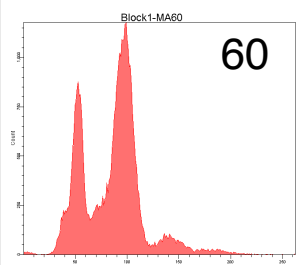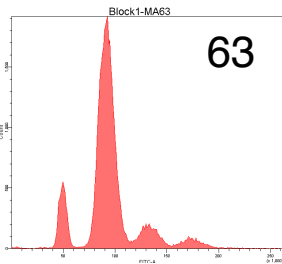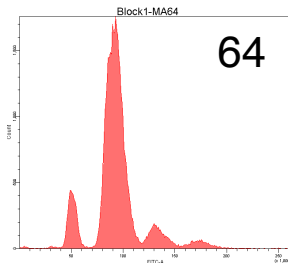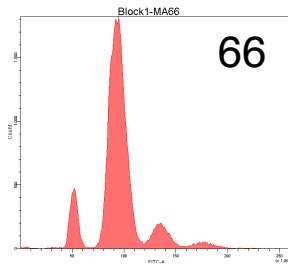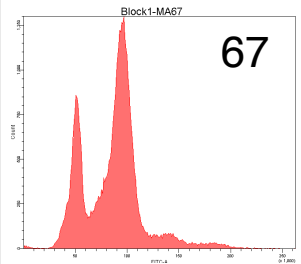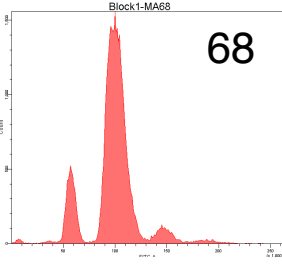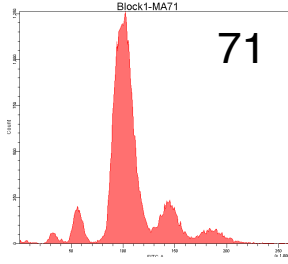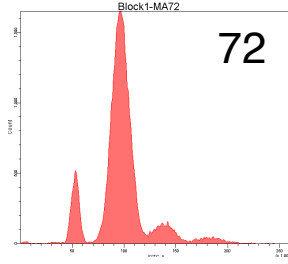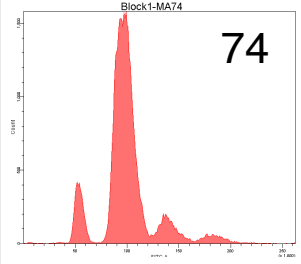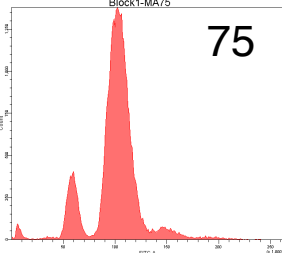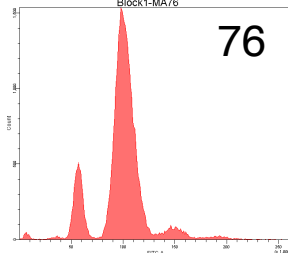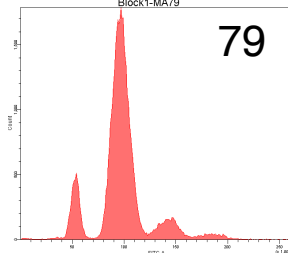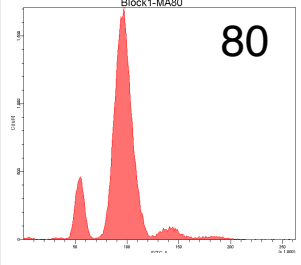

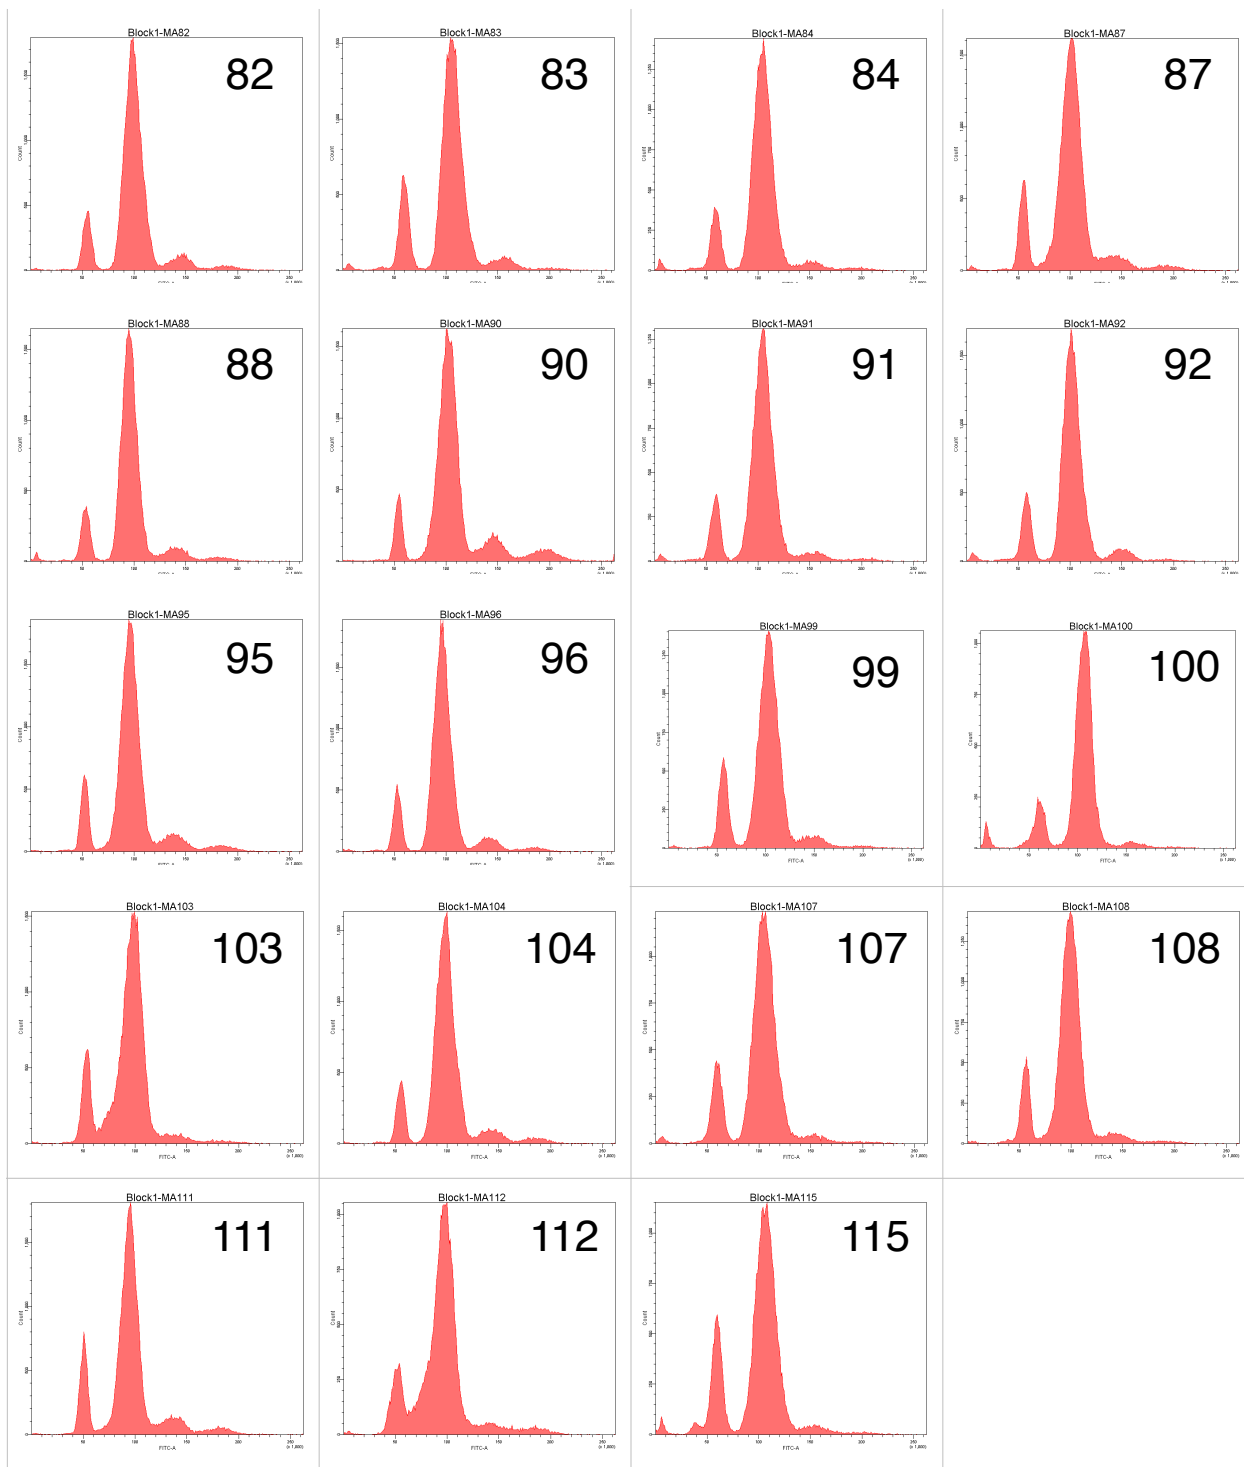

## Block 2

# Haploid

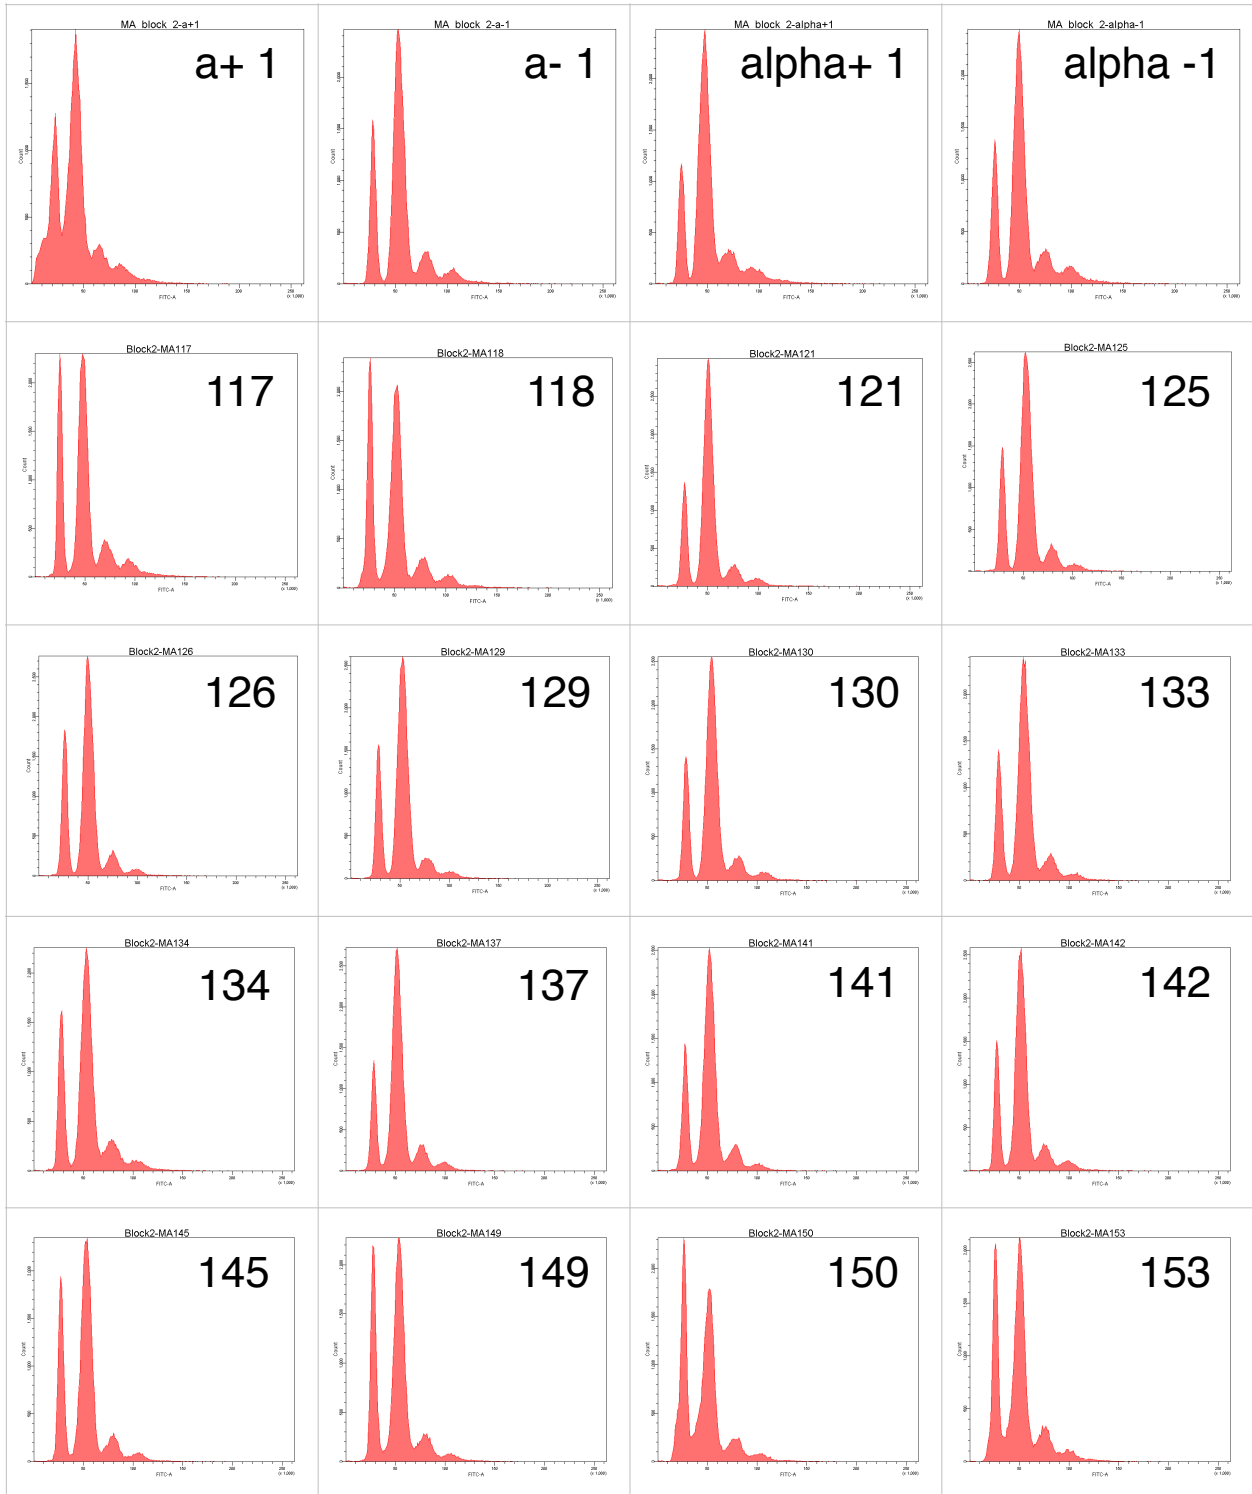

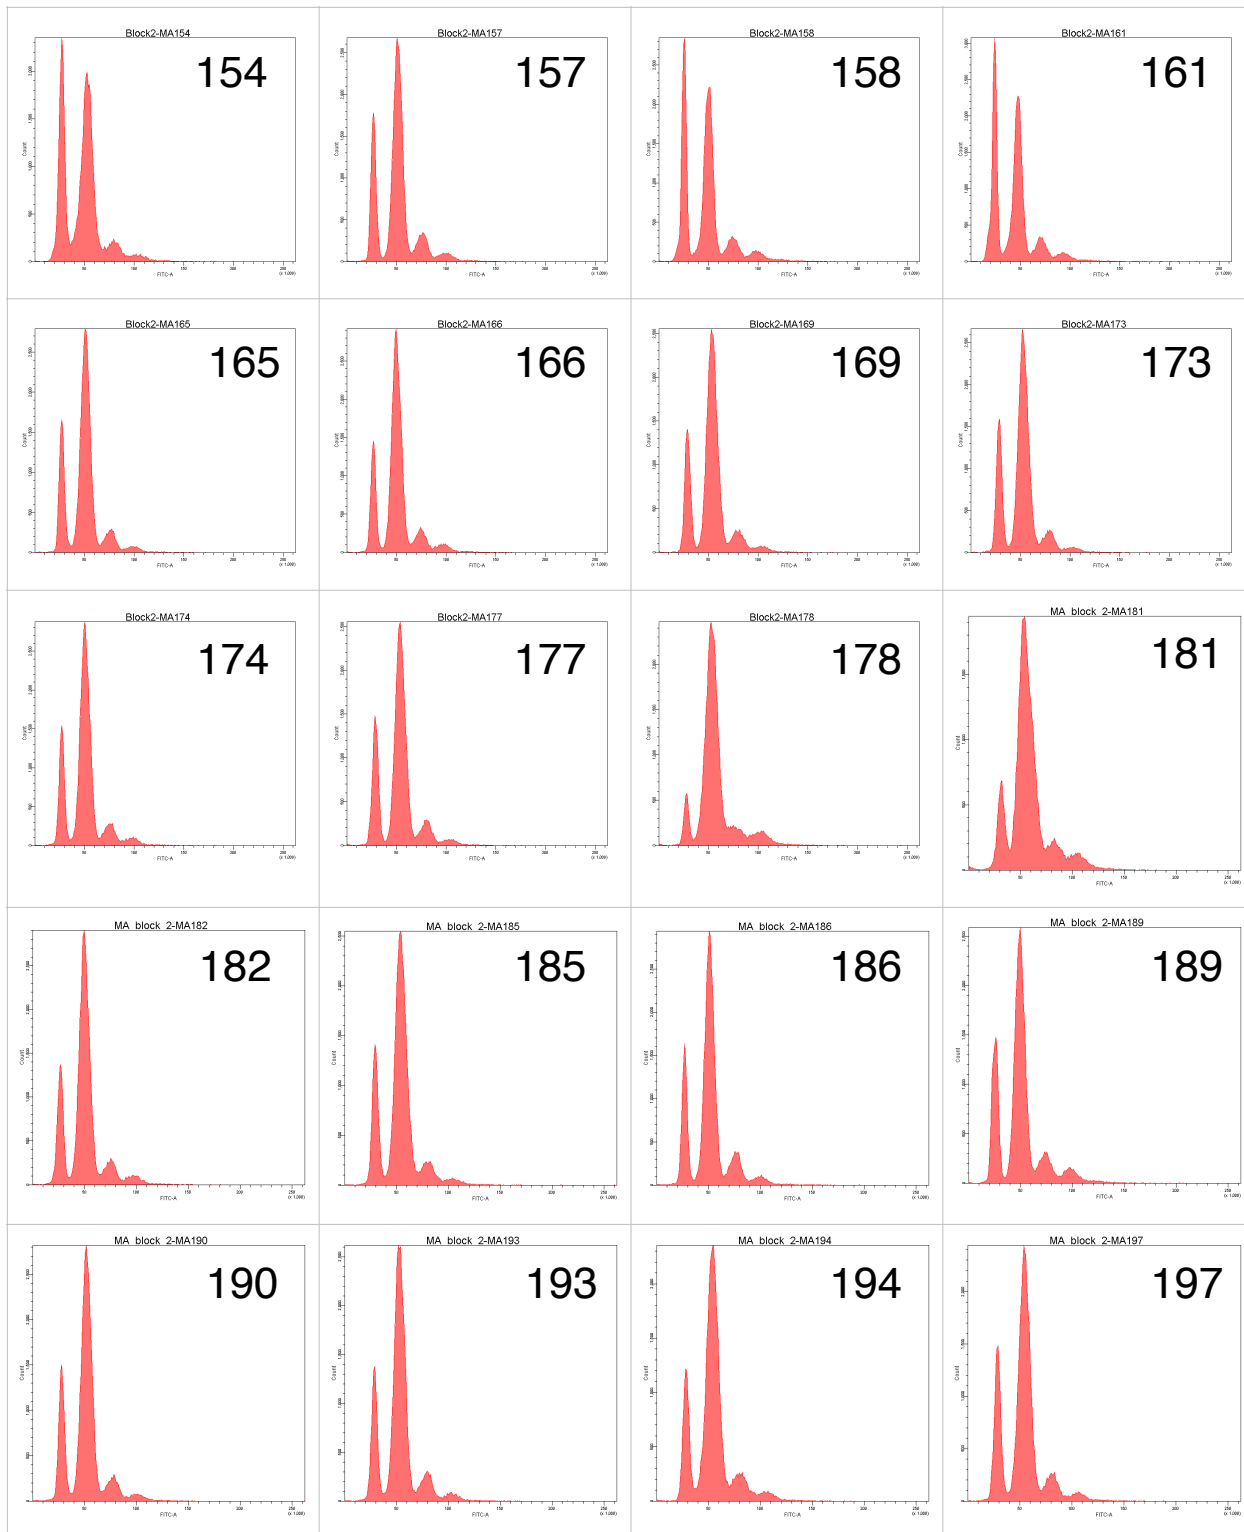

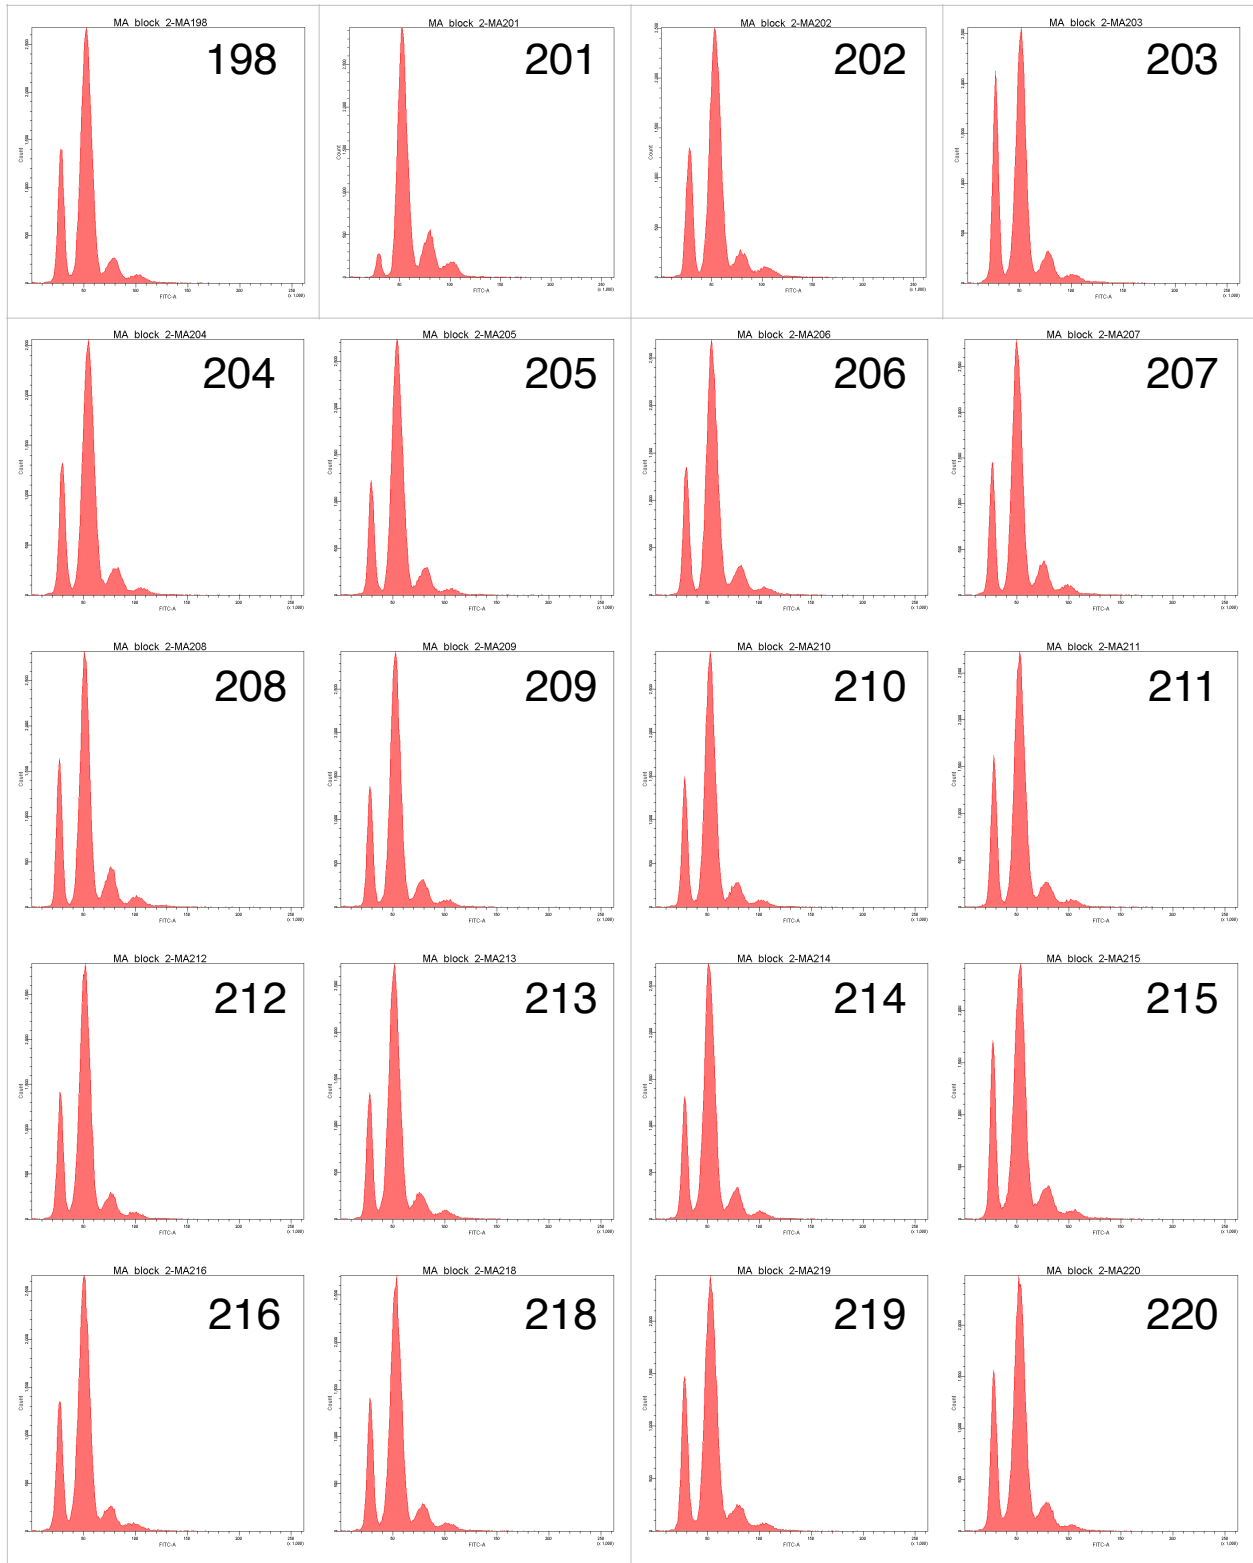

Diploid

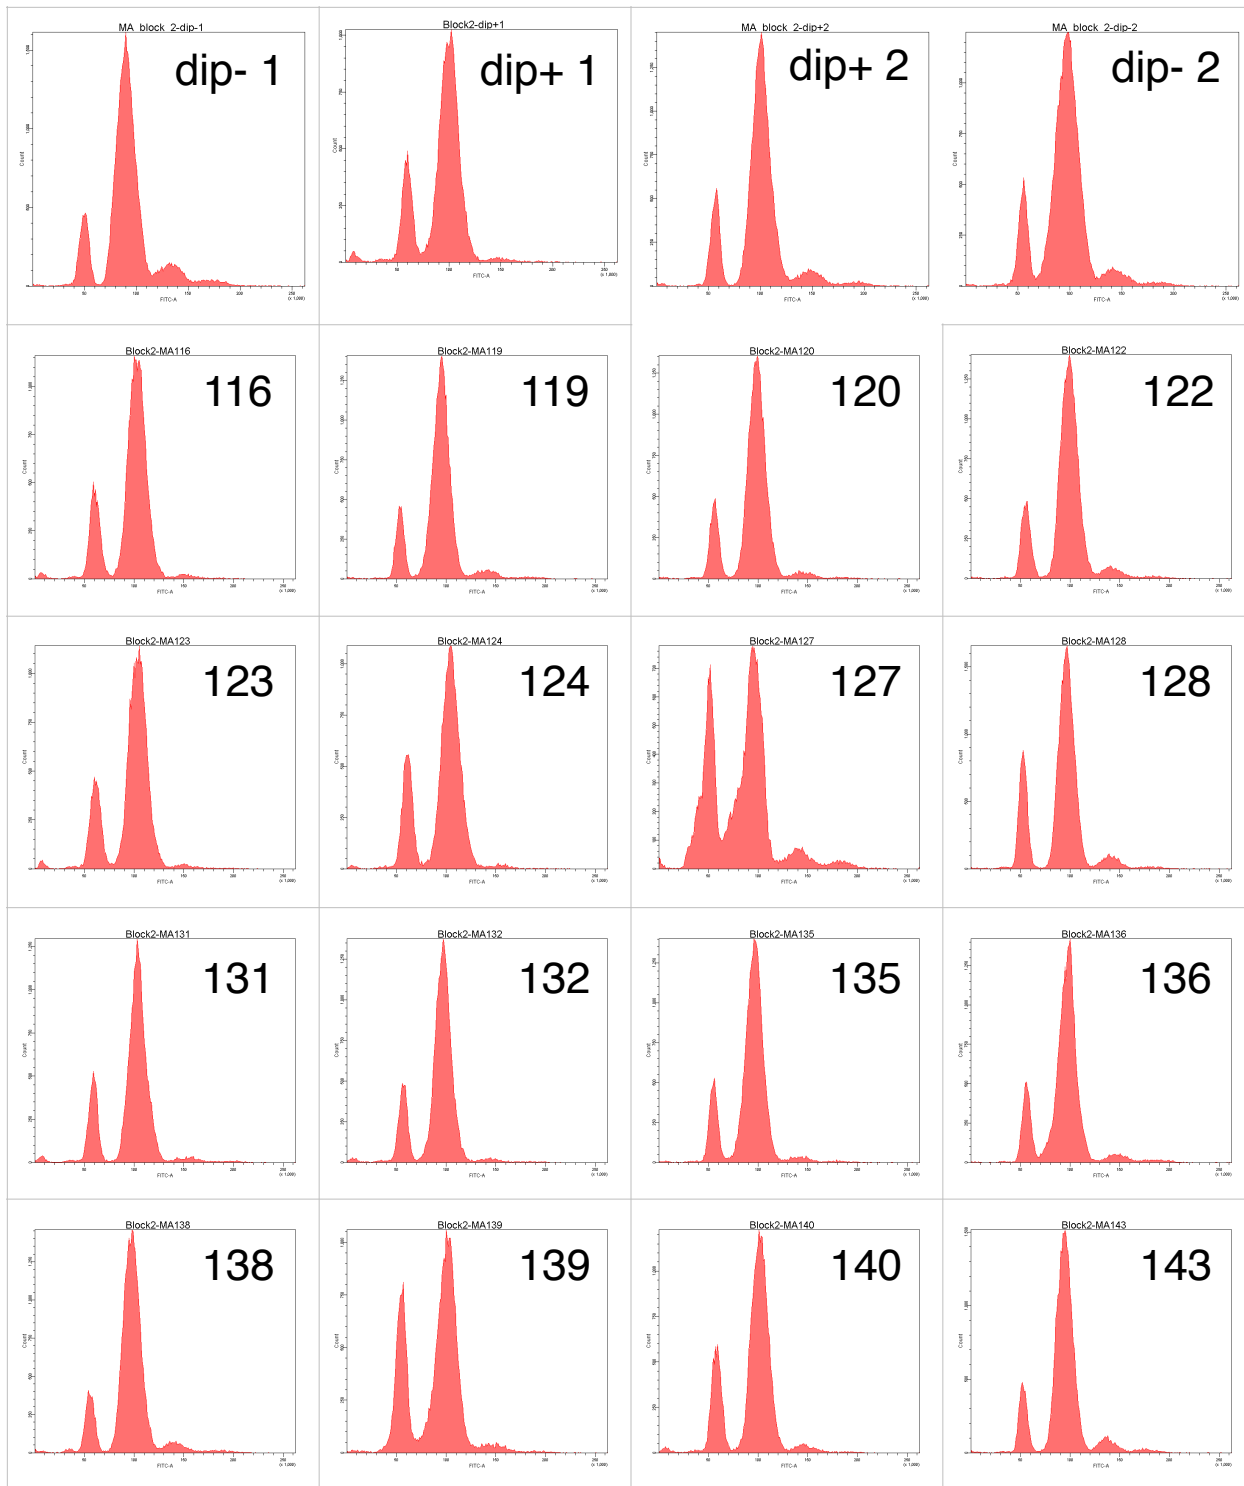

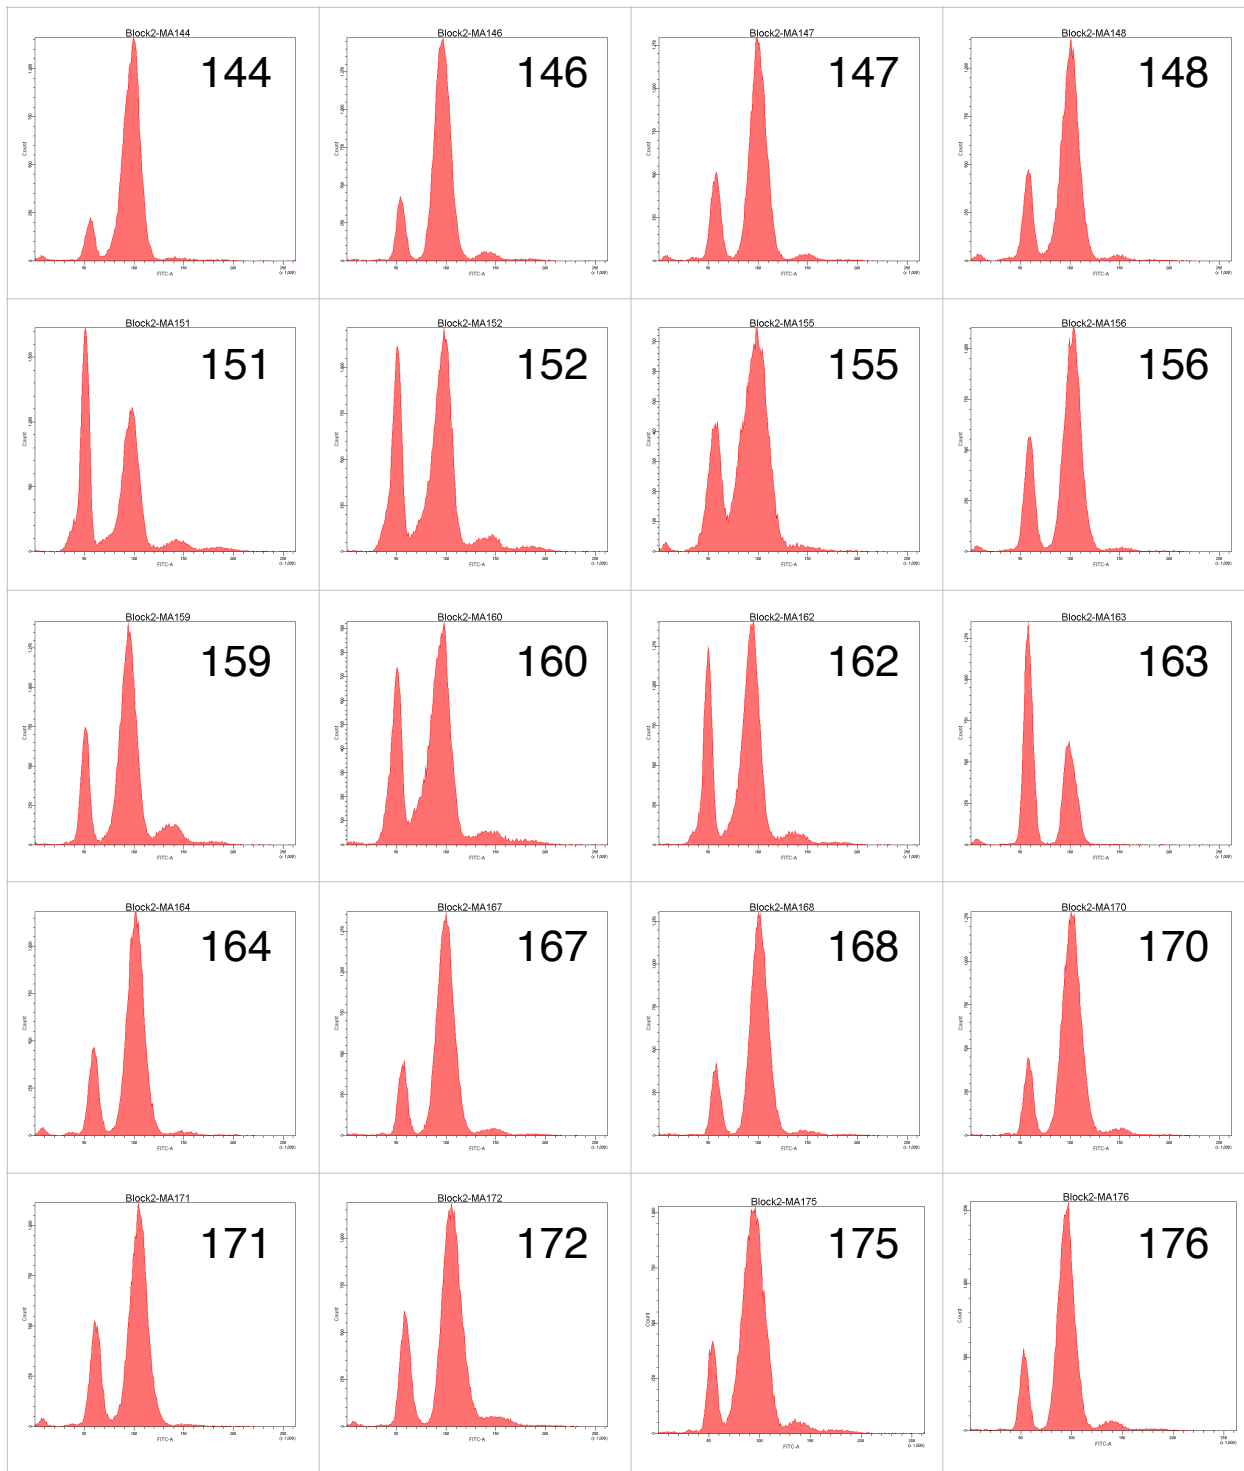

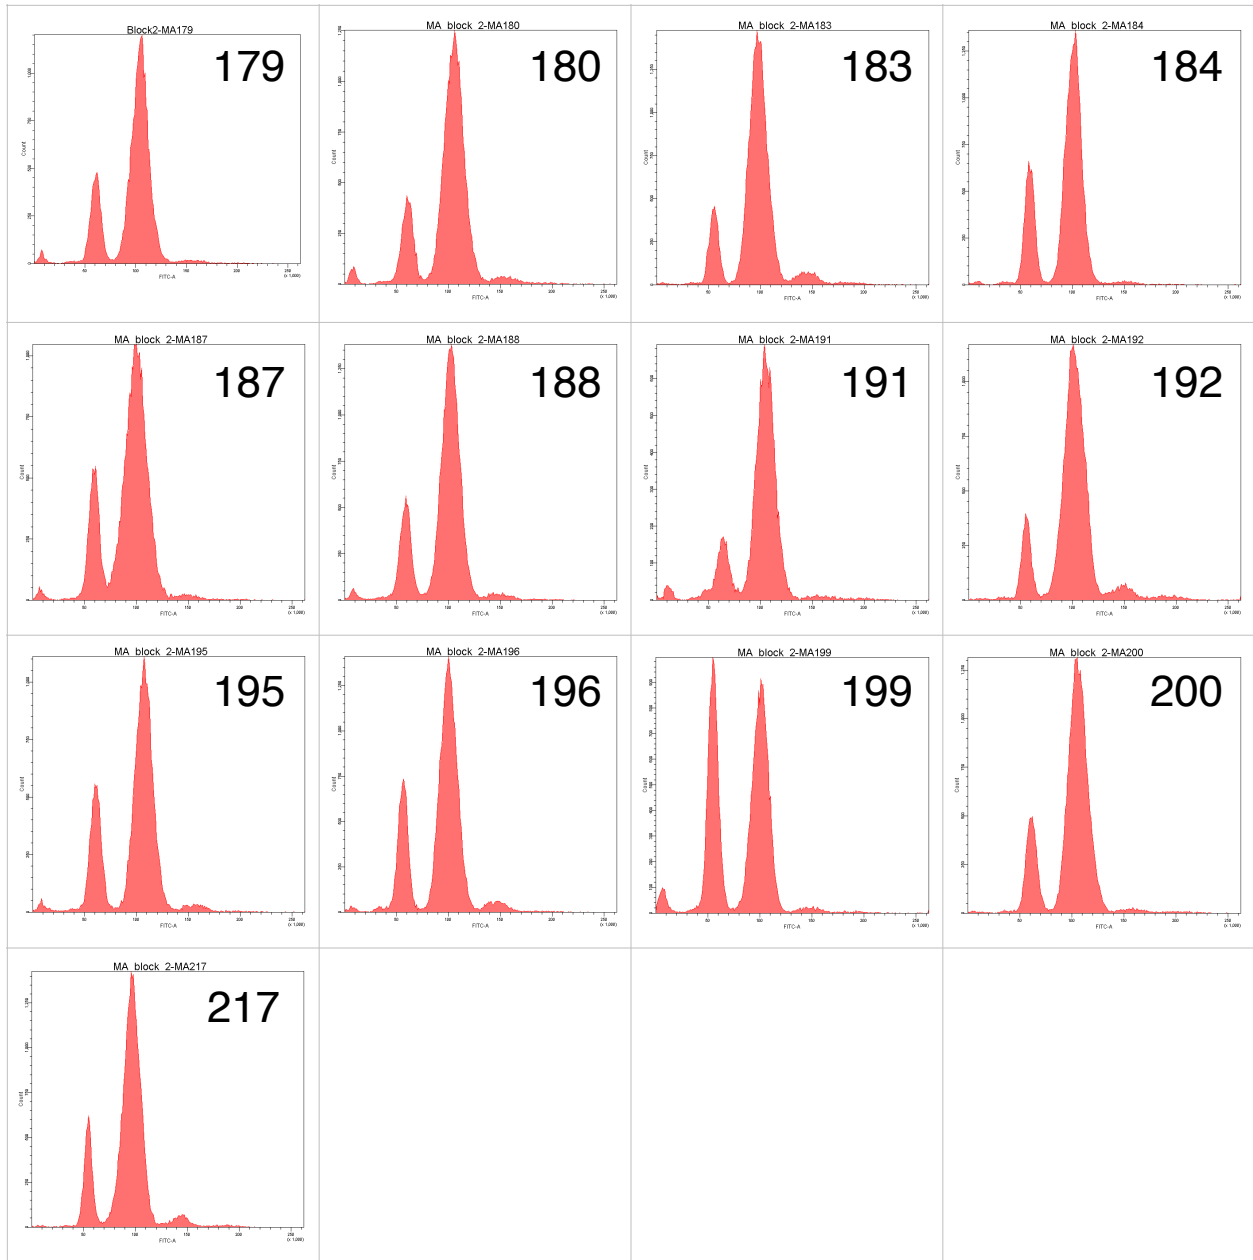

## Reruns

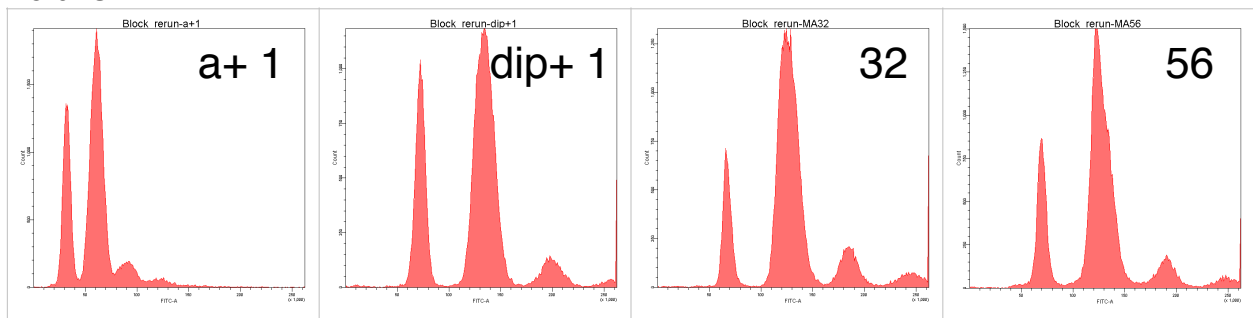



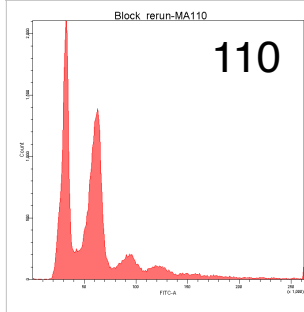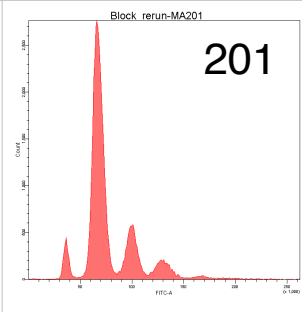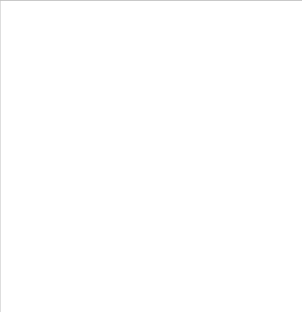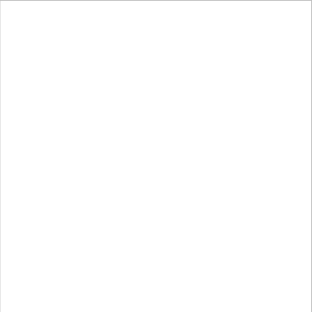

Supplement: pnas.1801040115.sd01.pdf [file pnas.1801040115.sd01.pdf]
